# Supplementary material for: Leap and strike kinetics of an acoustically ‘hunting’ barn owl (Tyto alba)
Source: PubMed Central journal article supplement (PMC4148188; doi:10.1242/jeb.107169), 2014-09-01
Supplement: supp_217.17.3002_JEB107169.pdf [file supp_217.17.3002_JEB107169.pdf]

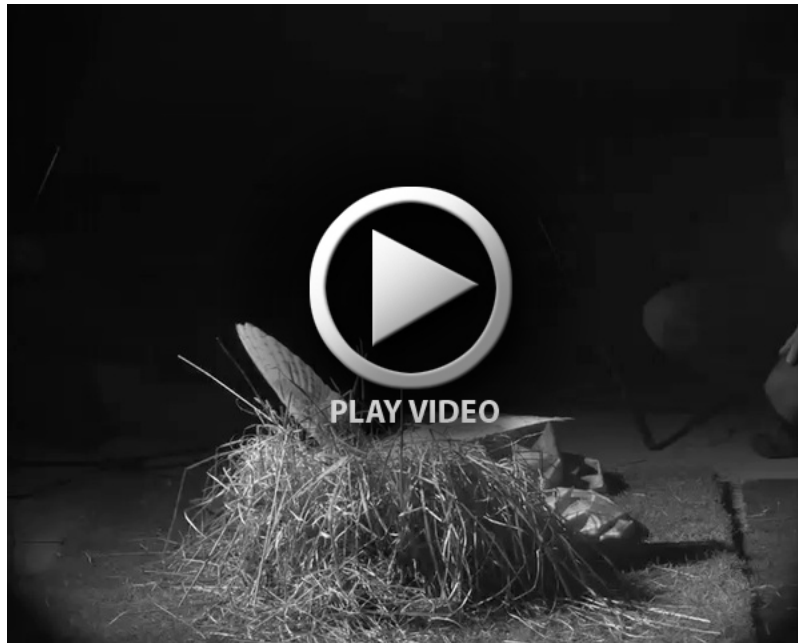

**Movie 1.** High speed video (no audio) of a complete leap/strike trial. Recorded at 500 frames  $s^{-1}$ ; displayed at 24 frames  $s^{-1}$ .

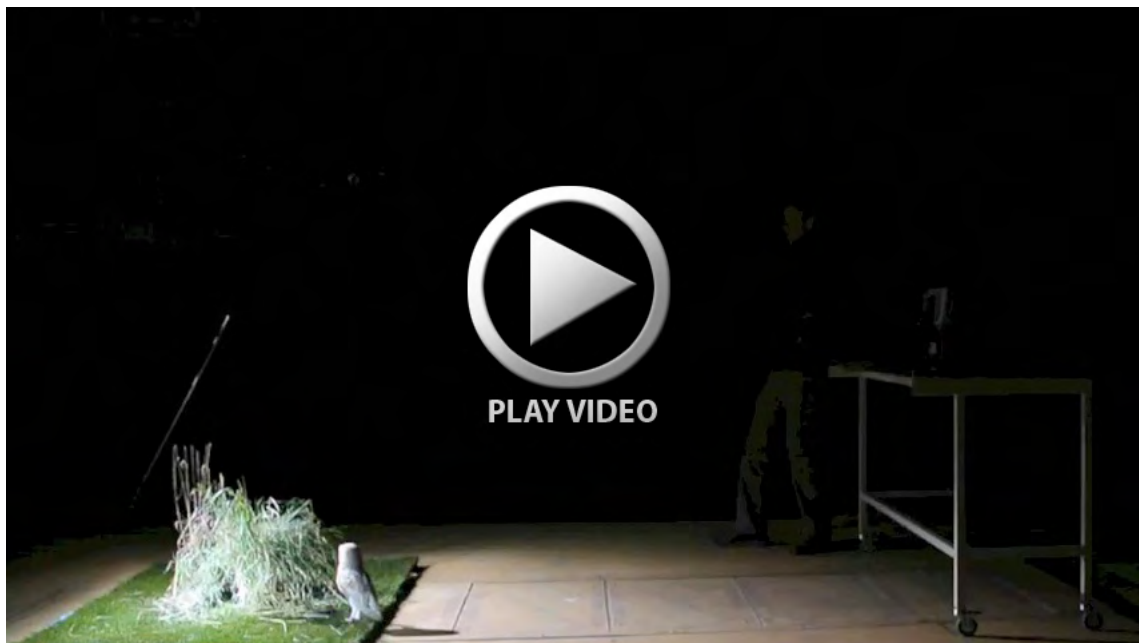

**Movie 2.** Video and audio of a leap/strike trial. Recorded at 30 frames  $s^{-1}$ ; displayed (video and audio) at quarter speed.
